# Supplementary material
Source: Springer Nature journal article supplement (https://www.springermedizin.de/resource/supplementary/13256_2014_2950_MOESM4_ESM.pdf/9650890)

L

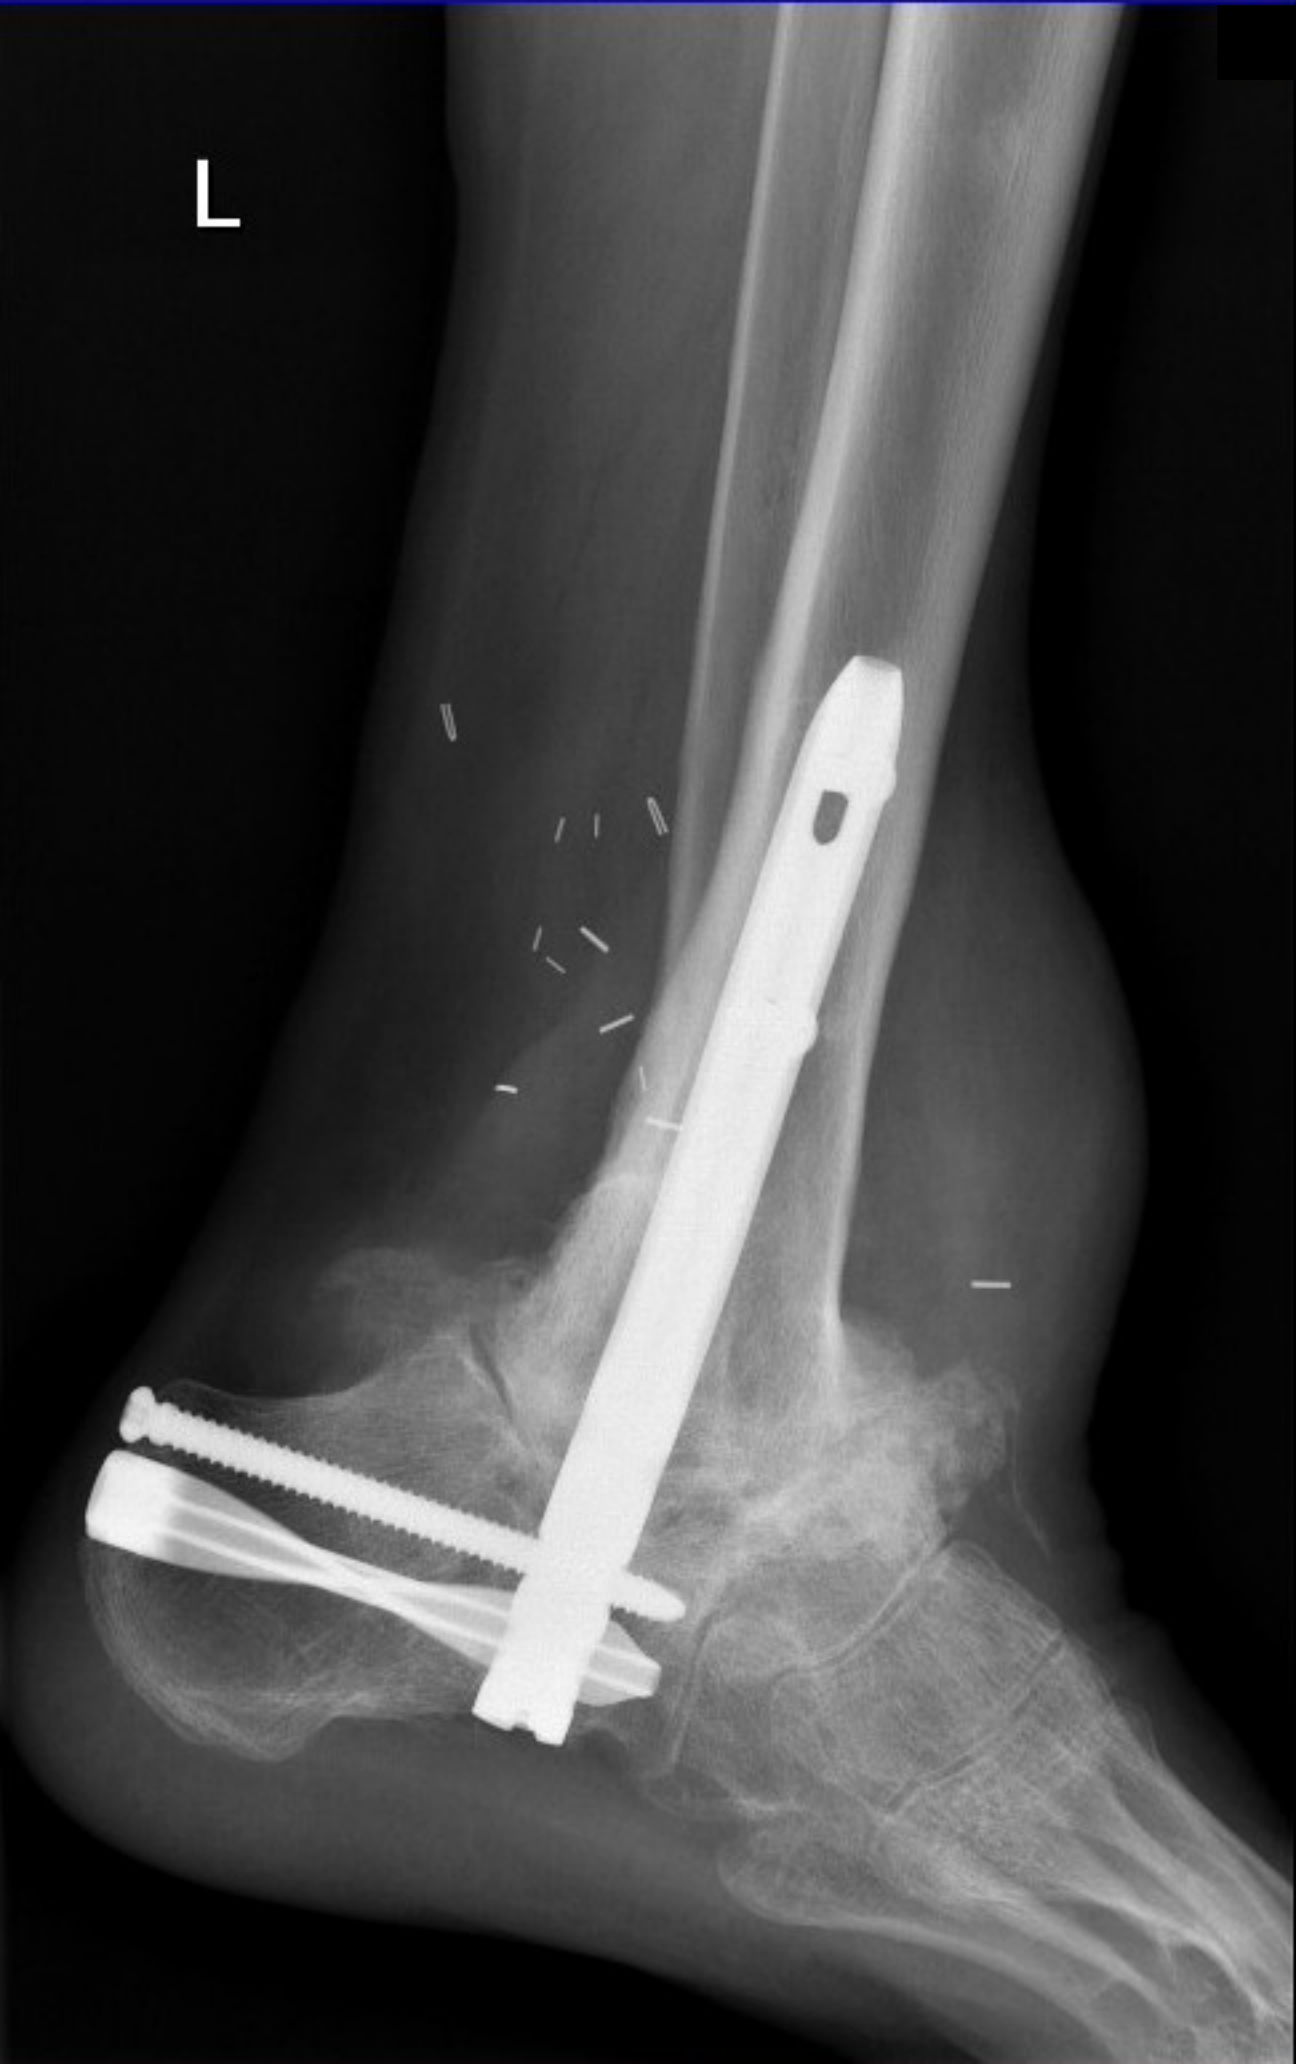

Supplement: MOESM4 [file 9650890]
